# Supplementary material for: Lunasin Attenuates Obesity-Associated Metastasis of 4T1 Breast Cancer Cell through Anti-Inflammatory Property
Source: PubMed Central journal article supplement (PMC5187909; doi:10.3390/ijms17122109), 2016-12-15
Supplement: ijms-17-02109-s001.pdf [file ijms-17-02109-s001.pdf]

# Supplementary Materials: Lunasin Attenuates Obesity-Associated Metastasis of 4T1 Breast Cancer Cell through Anti-Inflammatory Property

Chia-Chien Hsieh, Chih-Hsuan Wang and Yu-Shan Huang

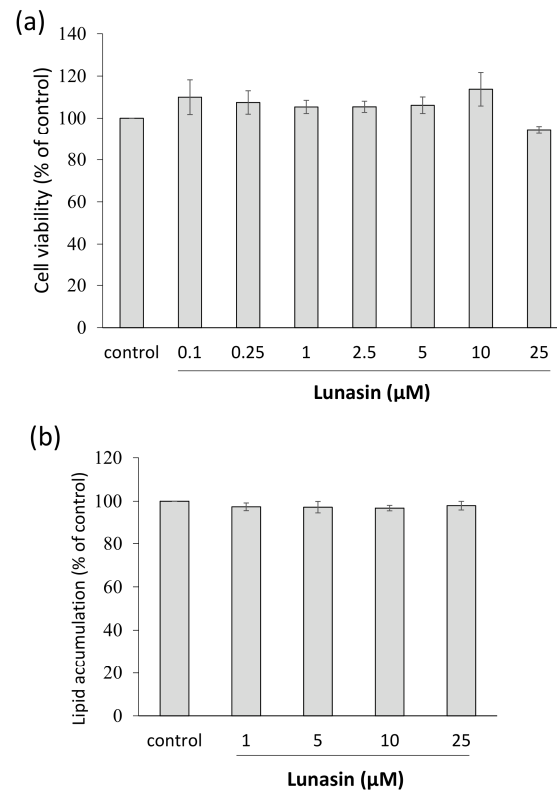

**Figure S1.** Lunasin did not affect 3T3-L1 fibroblast differentiation and fat storage in mature adipocytes. (a) Cell viability of cells treated with increasing doses of lunasin for 48 h measured by MTT test; (b) Lipid accumulation in 3T3-L1 cells was stained with Oil Red O, and lipid droplets were dissolved using 2-propanol, and then quantified by a spectrophotometer at 500 nm absorbance. Data are shown as mean  $\pm$  SEM. Statistical analysis was tested by one-way ANOVA and then Fisher's LSD test.
